1           **Effect of tRNA maturase depletion on the levels and stabilities**  
2           **of ribosome assembly cofactor mRNAs in *Bacillus subtilis***

3  
4           Aude Trinquier, Ciarán Condon\* and Frédérique Braun\*

5  
6                           \*co-corresponding authors

7  
8  
9  
10           CNRS, Université Paris Cité, Expression Génétique Microbienne,  
11           Institut de Biologie Physico-Chimique, 13 rue Pierre et Marie Curie, 75005 Paris, France

12  
13  
14                           Email: braun@ibpc.fr; condon@ibpc.fr

15  
16  
17           Key words: *RNA degradation, tRNA processing, translation, chloramphenicol, (p)ppGpp*

18  
19

20 **Abstract**

21 The impact of translation on mRNA stability can be varied, ranging from a protective effect  
22 of ribosomes that shield mRNA from ribonucleases (RNases), to preferentially exposing sites  
23 of RNase cleavage. These effects can change depending on whether ribosomes are actively  
24 moving along the mRNA or whether they are stalled at particular sequences, structures or  
25 awaiting charged tRNAs. We recently observed that depleting *B. subtilis* cells of its tRNA  
26 maturation enzymes RNase P or RNase Z, led to altered mRNA levels of a number of  
27 assembly factors involved in the biogenesis of the 30S ribosomal subunit. Here, we extend  
28 this study to other assembly factor mRNAs and identify multiple transcriptional and  
29 translational layers of regulation of the *rimM* operon mRNA that occur in response to the  
30 depletion of functional tRNAs.

31

32

33 **Importance**

34 The passage of ribosomes across individual mRNAs during translation can have different  
35 effects on their degradation, ranging from a protective effect by shielding from  
36 ribonucleases, to in some cases, making the mRNA more vulnerable to RNase action. We  
37 recently showed that some mRNAs coding for proteins involved in ribosome assembly were  
38 highly sensitive to the availability of functional tRNA. Using strains depleted for the major  
39 tRNA processing enzymes RNase P and RNase Z, we expanded this observation to a wider set  
40 of mRNAs, including some unrelated to ribosome biogenesis. We characterize the impact of  
41 tRNA maturase depletion on the *rimM* operon mRNA and show it is highly complex, with  
42 multiple levels of transcriptional and post-transcriptional effects coming into play.

## 43 Introduction

44 The steady-state level of any mRNA in the cell is determined by both its rate of  
45 transcription by RNA polymerase and its rate of degradation by ribonucleases (RNases).  
46 These can work together to increase or decrease gene expression at the transcriptional or  
47 post-transcriptional levels in response to environmental stimuli, or can pull in opposing  
48 directions, resulting in little net gain. While most of the enzymes responsible for RNA decay  
49 are now known in *B. subtilis* (1), how these enzymes are impacted by translation is still a  
50 relatively open question. The conventional wisdom is that increased translation leads to  
51 increased stability due to the masking of RNase cleavage sites by ribosomes. However, we  
52 have recently identified an endoribonuclease (Rae1) that actually depends on translation to  
53 destabilize mRNAs (2, 3), and we will present data here suggesting that antibiotics that cause  
54 ribosome pausing can both positively and negatively impact mRNA levels, depending on the  
55 severity and time of the dose.

56 Efficient translation depends on an unlimited supply of functional charged transfer RNAs  
57 (tRNAs). tRNAs are almost universally transcribed as precursors in all living organisms, with  
58 both 5' and 3' extensions that must be removed to generate tRNAs that can be charged and  
59 used in translation. In *B. subtilis*, tRNAs are matured at their 5' end by the ubiquitous  
60 endoribonuclease RNase P, consisting of a catalytic RNA moiety encoded by the *rnpB* gene  
61 and a protein subunit encoded by the *rnpA* gene (4). Their 3' ends are matured either by the  
62 endo/exoribonuclease RNase Z, or by a number of redundant 3' exoribonucleases,  
63 depending nominally on whether the tRNA gene encodes the CCA motif required for  
64 aminoacylation (5). RNase Z processes the one-third of *B. subtilis* tRNAs lacking an encoded  
65 CCA-motif through stimulation of its endoribonuclease activity about 200-fold by a uracil  
66 residue that naturally occurs  $\leq 2$  nts downstream of the so-called discriminator nucleotide  
67 (nt 75) of each of these tRNA precursors (6). The enzyme's 3'-exoribonuclease activity is  
68 required to trim back to nt 75 to allow addition of the CCA motif by nucleotidyl-transferase  
69 (NTase or CCAsE). Both RNase P and Z are essential in *B. subtilis* and depletion of either  
70 enzyme inhibits cell growth, presumably due to a lack of functional tRNAs for translation.

71 Translation can also be inhibited by antibiotics that target the ribosome, such as  
72 chloramphenicol (Cm), that targets the peptidyl transferase center (PTC) located on the  
73 large ribosomal subunit. Although it was once thought that Cm blocked translation  
74 randomly, recent ribosome profiling experiments have shown that Cm preferentially causes

75 ribosomes to stall at particular sites, in particular when alanine (Ala) or serine (Ser) residues  
76 have just been incorporated into the nascent peptide (7).

77 We have recently shown that depletion of tRNA maturase activity affects ribosome  
78 assembly leading to a specific 30S subunit late assembly defect (8). While this defect was  
79 mostly explained by a RelA-dependent accumulation of the stringent response alarmone  
80 (p)ppGpp, and inhibition of GTP-dependent assembly factor activity, we also observed that  
81 the levels of several mRNAs encoding ribosome assembly cofactors were affected. Notably,  
82 the steady state levels of transcripts encoding the GTPases Era and YqeH were up-regulated  
83 during tRNA maturase depletion, whereas mRNAs encoding the GTPase CpgA and the RNA  
84 chaperone RimM were down-regulated. Because RNase P is thought to have very few direct  
85 mRNA targets, and because RNase Z depletion had comparable effects on the expression of  
86 these mRNAs, we considered it unlikely that the effects observed were directly due to RNase  
87 P or RNase Z cleavages in each of these mRNAs. We therefore wished to better understand  
88 by which mechanism(s) tRNA maturase depletion affected the levels of the cofactor  
89 encoding mRNAs. Since the late 30S ribosome assembly defect observed in tRNA maturase  
90 depletion strains was very similar to that observed in both *E. coli* and *B. subtilis*  $\Delta rimM$   
91 mutants, we put additional focus on exploring the decrease in *rimM* expression under these  
92 conditions.

## 93 **Results**

### 94 **tRNA maturase depletion alters assembly factor mRNA levels**

95 We previously showed that depletion of RNase P or RNase Z results in altered mRNA  
96 levels of four key 30S assembly cofactors (Era, YqeH, RimM and CpgA) (8). The effects of  
97 depleting the RNA subunit of RNase P (RnpB) were more severe than the protein subunit  
98 (RnpA), presumably because the RNA component of RNase P is more rapidly depleted than  
99 the protein subunit once transcription is shut off. To ask whether this applied to other  
100 mRNAs involved in ribosome biogenesis, we extended this analysis to the expression of  
101 several other cofactor and ribosomal protein mRNAs, using xylose (*P<sub>xyI</sub>-rnpA*) or IPTG-  
102 dependent (*P<sub>spac</sub>-rnpB* and *P<sub>spac</sub>-rnz*) promoter constructs to deplete the protein and RNA  
103 subunits of RNase P, and RNase Z, respectively. The two control transcripts, *yqeH* and *era*,  
104 and three new transcripts, *ydaF* and *yjck* (encoding two potential homologs of the *E. coli*

105 RimJ acetylase), and *rpsU* (encoding r-protein S21) were globally increased under conditions  
106 of tRNA maturase depletion (Figure 1A), while *rimM*, *cpgA* (controls) and *yfmL* transcripts  
107 (encoding a DEAD-box helicase), all showed decreased expression, with a visible  
108 accumulation of degradation intermediates for *yfmL* (Figure 1B). Expression of the *rbfA* and  
109 *ylxS/rimP* mRNAs were relatively unchanged (Figure 1C), showing that tRNA maturase  
110 depletion does not cause non-specific perturbation of the expression of all *B. subtilis*  
111 ribosome assembly cofactor genes. Although the primary focus of this study was on  
112 assembly factor mRNAs because of the link to a defect in 30S biogenesis, we also asked  
113 whether effects of tRNA maturase depletion could be seen on other mRNAs. Indeed, mRNAs  
114 from the *yrzI* and *bmrCD* operons, encoding multiple peptides of unknown function and a  
115 multi-drug resistance pump, respectively, were also up-regulated upon RNase P or RNase Z  
116 depletion (Figure 1D), suggesting this phenomenon is not confined to mRNAs with ribosome-  
117 related functions.

118

#### 119 **tRNA maturase depletion and the translation inhibitor chloramphenicol alter mRNA** 120 **stability in a similar manner**

121 To determine whether tRNA maturase depletion impacted mRNA expression at the  
122 transcriptional or post-transcriptional level, we measured the stability of several of these  
123 mRNAs after rifampicin treatment in RNase P (RnpA or RnpB) depleted cultures. The up-  
124 regulated transcripts (*yqeH*, *era*, *ydaF* and *yjck*) were all stabilized during RnpA and RnpB  
125 depletion (Figure 2A and B; Figure S1), suggesting that they are affected by RNase P  
126 depletion at the post-transcriptional level. There is evidence that the lack of functional  
127 tRNAs can increase ribosome stalling on translated mRNAs (9). Thus, the increased stability  
128 of these transcripts could be due to ribosome stalling and the blocking of ribonuclease  
129 access to cleavage sites on these mRNAs. To test this hypothesis, we sought to recapitulate  
130 the effect by pausing translation in a different manner, using the translation elongation  
131 inhibitor Cm. Indeed, the addition of sub-inhibitory (2.5  $\mu\text{g}/\text{mL}$ ) and minimal inhibitory (MIC;  
132 5  $\mu\text{g}/\text{mL}$ ) concentrations of Cm to WT cells also increased the levels of the *yqeH*, *era*, *ydaF*  
133 and *yjck* mRNAs (Figure 2C), suggesting that the stabilization of these transcripts in tRNA  
134 maturase depletion strains is most likely due to the lack of mature tRNA and ribosome  
135 stalling.

136 The situation with the down-regulated transcripts was more complicated. The major  
137 *rimM* (5, 3.5 and 1.8 kb) and *cpgA* (5 and 4.5 kb) transcripts were strongly destabilized in  
138 RNase P RNA subunit (RnpB) depleted cells (Figure 3B; Figure S2), suggesting that the  
139 decrease in expression also occurs at a post-transcriptional level in this strain. A similar  
140 decrease in expression was seen after 30 minutes at high (MIC) Cm concentration in WT cells  
141 for *rimM* and rapidly upon exposure to Cm for *cpgA* (Figure 3C), suggesting that this  
142 phenomenon is also linked to ribosome stalling. For both *cpgA* and *yfmL*, the major  
143 transcripts were processed to shorter forms in the absence of RnpB or in the presence of Cm  
144 (Fig. 3B). One possibility is that, in contrast to the up-regulated mRNAs, when non-functional  
145 tRNA precursors accumulate to high levels in the *rnpB*-depletion strain, ribosomes  
146 eventually stall at sites that preferentially allow RNase access, or that the RNAs are largely  
147 unoccupied by ribosomes.

148 In the less severely depleted *rnpA* strain, the full-length (5 kb) *rimM* transcript and the  
149 two major *cpgA* mRNAs were stabilized (or showed little effect), rather than destabilized as  
150 seen for *rnpB* (Figure 3A). These results suggest that down-regulation of *rimM* and *cpgA*  
151 arises from a mixture of transcriptional (down) and post-transcriptional (up initially, then  
152 down) effects and that one or other effect predominates depending on the severity of RNase  
153 P depletion. Indeed, upon close inspection of Figure 3C, *rimM* and *cpgA* mRNA levels initially  
154 increase at 15 mins and then decrease after further exposure to Cm at both sub-inhibitory  
155 and MIC doses. Thus, the Cm effect globally tracks the effect of tRNA depletion, with the  
156 weak Cm dose (2.5  $\mu\text{g}/\text{mL}$ ) mimicking the weak effect of depleting RnpA, and the strong Cm  
157 dose (5  $\mu\text{g}/\text{mL}$ ) mimicking the strong effect of depleting RnpB, consistent with the notion of  
158 opposing responses to severe vs less severe levels or duration of translation inhibition.

### 159 **Identification of *rimM*-containing transcripts sensitive to RNase P depletion**

160 Because the  $\Delta rimM$  phenotype closely fitted the 30S late assembly defect observed in  
161 strains depleted for RNase P or RNase Z (8), we attempted to narrow down the determinants  
162 of the down-regulation of this operon. The *rimM* gene is encoded in a large operon  
163 containing several genes encoding components of the translation machinery: ribosomal  
164 protein genes *rpsP* and *rplS* (encoding S16 and L19, respectively), signal recognition particle  
165 components (encoded by *ffh* and *ylxM*) and *trmD* that encodes a tRNA methyltransferase. To  
166 identify the gene composition of the three *rimM*-containing transcripts, we performed

167 northern blots with probes located in ORFs of the neighboring genes (Figure S3). In all, six  
168 different transcripts originate from this locus (Figure 4A). Promoters upstream of *ylxM* ( $P_1$ )  
169 and *rpIS* ( $P_3$ ), and terminators downstream of *ylqC* and *rpIS* ( $T_1$  and  $T_3$ , respectively) were  
170 identified earlier by transcriptome analysis (10). Our Northern blot analysis suggested that  
171 two transcripts originate from  $P_1$ : the full-length mRNA (5 kb, highlighted in purple) that  
172 terminates at  $T_3$ , and a shorter transcript (2.5 kb, highlighted in orange) that terminates at  $T_1$   
173 and does not contain the *rimM* ORF. The smallest species identified (0.5 kb, highlighted in  
174 yellow) corresponds to the mono-cistronic *rpIS* transcript ( $P_3$  to  $T_3$ ). Using end-enrichment  
175 RNA sequencing (Rend-seq), DeLoughery *et al.* identified a third transcription start site ( $P_2$ )  
176 located just upstream of *rpsP* and only 18 nts downstream of an RNase Y cleavage site in the  
177 *ffh-rpsP* intergenic region, in addition to a potential terminator/attenuator ( $T_2$ ) within the  
178 *trmD* ORF (11). The three remaining transcripts (0.7 kb, highlighted in green; 1.8 kb, in cyan;  
179 3 kb, in pink, and marked with an asterisk in Figure 4A) therefore correspond either to  $P_2$   
180 primary transcripts, or RNase Y-processed transcripts originating from  $P_1$ , which terminate at  
181  $T_1$ ,  $T_2$  and  $T_3$ , respectively. Interestingly, of the six transcripts encoded by this locus, only the  
182 three containing both the *ylqD* and *rimM* ORFs were down-regulated upon RNase P  
183 depletion (Figure 4B).

#### 184 **A determinant for down-regulation of the *rimM* operon is located within the *ylqD* ORF**

185 To further narrow down which ORF was responsible for down-regulation of *rimM* operon  
186 expression, we sub-cloned the *ylqD-rimM* or *rimM*-only parts of the operon under control of  
187 a *Pspac* promoter, rendered constitutive by deleting the *lac* operator (*Pspac*(con); Table S3),  
188 with an artificial terminator hairpin to provide a defined 3' end. The constructs were  
189 integrated into the chromosome at the *amyE* locus and levels of the ectopic transcript were  
190 analyzed by Northern blot in RNase P-depleted cells using a probe specific for *rimM*. The  
191 steady state levels of the synthetic *ylqD-rimM* transcript were down-regulated in response  
192 to RNase P depletion, albeit not as dramatically as the native operon (1.3- vs 2.3-fold),  
193 suggesting that a determinant involved in down-regulation is still included in this shorter  
194 construct (Figure 5A and B). Two degradation intermediates (~0.5 and ~0.4 kb in size) of the  
195 *ylqD-rimM* transcript also accumulated, suggesting that this transcript is cleaved twice under  
196 conditions of RnpB-depletion. It is possible that the weaker effect of RnpB-depletion the full-  
197 length transcript and the accumulation of visible degradation intermediates is explained by

198 the presence of a stabilizing terminator hairpin at the 3' end of each of these species that is  
199 not present in the native mRNA. Intriguingly, the construct containing only the *rimM* ORF  
200 (with the same 3' terminator) was up-regulated in response to RNase P depletion (Figure 5C  
201 and D). In combination, these results suggest that the region responsible for post-  
202 transcriptional down-regulation of *rimM*-containing transcripts upon depletion of RNase P is  
203 primarily located within the *ylqD* ORF.

204 Since unprocessed tRNAs accumulate in RNase P and RNase Z depleted cells, we  
205 wondered whether they could act as potential post-transcriptional regulators of target  
206 mRNAs by base pairing to their targets *via* their single stranded 5' and 3' extensions. Using  
207 TargetRNA2 (12), a prediction program used for identifying targets of small RNAs (sRNAs) in  
208 bacteria, we identified an 11-nt region within the *ylqD* ORF that could potentially base-pair  
209 with the 5' immature extension of unprocessed *trnD-Tyr* tRNA (Figure 5B). To test whether  
210 this sequence was involved in down-regulation of the *ylqD-rimM* construct in cells depleted  
211 for RNase P, we weakened the putative base pairing interaction by introducing mutations in  
212 the *ylqD* mRNA sequence (while maintaining the YlqD amino acid sequence as much as  
213 possible) (Figure 5B). The mutant *ylqD\*-rimM* construct was down-regulated and processed  
214 similarly to the wt under conditions of RNase P depletion, suggesting that 5' extended *trnD*-  
215 *Tyr* does not act as a post-transcriptional regulator of this operon. For the moment, the  
216 sequence element(s) within *ylqD* responsible for down-regulation of the *rimM* operon under  
217 conditions of tRNA maturase depletion remain(s) unknown.

### 218 **Down-regulation of *rimM* expression under physiological conditions resulting in reduced** 219 ***rnpA* expression is independent of immature tRNA accumulation**

220 We next asked whether the down-regulation of the *rimM operon* we observed during  
221 RNase P depletion, would also occur in physiological conditions where RNase P expression is  
222 reduced. The level of expression of the *rnpB* RNA is relatively constant in tiling array  
223 experiments in over a hundred conditions tested, whereas *rnpA* mRNA levels decrease upon  
224 ethanol addition and during stationary phase in both complex and minimal media (Figure  
225 6A) (10). We confirmed that *rnpA* RNA expression was reduced to levels below detection in  
226 these three conditions in comparison with exponential growth in the respective medium, by  
227 Northern blot (Figure 6B). Ethanol treatment did not affect *rnpB* RNA levels; however, they  
228 were reduced during stationary phase in both minimal and complex medium, in contrast to



229 the tiling array data. The expression of *rimM* varied similarly to *rnpA* in the conditions tested  
230 (Figure 6B).

231 We next asked whether tRNA maturation was affected in stationary phase or upon  
232 addition of ethanol using a probe for *trnJ-Lys* tRNA. Surprisingly, despite the decreased levels  
233 of the *rnpA* mRNA in all three conditions, and *rnpB* in stationary phase, we did not observe  
234 an accumulation of pre-tRNAs (Figure 6C). It is possible that very few new tRNA molecules  
235 are synthesized under these conditions and/or that the remaining cellular RNase P activity  
236 provided by the stable RnpA protein and RnpB RNA is sufficient to ensure the processing of  
237 any that are transcribed. In either case, these experiments suggest that the down-regulation  
238 of *rimM* expression that accompanies the decrease in *rnpA* and *rnpB* expression in stationary  
239 phase or ethanol stress is more related to growth arrest than an accumulation of immature  
240 tRNAs.

#### 241 **Down-regulation of *rimM* in RNase P depletion strains depends partially on (p)ppGpp** 242 **production**

243 In bacteria, both stationary phase and ethanol stress are associated with increased  
244 production of (p)ppGpp, hyperphosphorylated guanosine derivatives that are known to  
245 globally reprogram transcription (13, 14). Considering that tRNA maturase-depleted cells  
246 also trigger a RelA-dependent production of (p)ppGpp (8), we asked whether *rimM* down-  
247 regulation in these cells was dependent on (p)ppGpp production, by measuring *rimM*  
248 expression in (p)ppGpp<sup>0</sup> strains depleted for RnpA or RnpB. The (p)ppGpp<sup>0</sup> strain lacks the  
249 three genes encoding (p)ppGpp synthesizing enzymes in *B. subtilis* (*yjbM*, *ywaC* and *relA*)  
250 (15). If (p)ppGpp were the key mediator, we would expect that the effect of RNase P  
251 depletion on *rimM* expression to be reduced or abolished in the (p)ppGpp<sup>0</sup> background.  
252 Rather than simply abolishing the effect, *rimM* transcripts actually showed higher levels in  
253 the tRNA maturase-depleted (p)ppGpp<sup>0</sup> strains compared to the RnpA or RnpB-depleted  
254 strains capable of making (p)ppGpp (Figure 7A), suggesting that (p)ppGpp has an  
255 independent repressive effect on *rimM* mRNA levels.

256 We thus assessed whether the alarmone (p)ppGpp could down-regulate *rimM*  
257 expression in the absence of a tRNA processing defect using an engineered strain that allows  
258 us to produce (p)ppGpp in the absence of immature tRNA accumulation or nutrient  
259 starvation (8). This (p)ppGpp<sup>+</sup> strain consists of an ectopic copy of the *ywaC* gene placed

260 under the control of a *P<sub>xyl</sub>* promoter in the (p)ppGpp<sup>0</sup> strain background. We used  
261 derepression of the CodY-regulated *ywaA* mRNA as a proxy to follow the increase in  
262 (p)ppGpp levels in this strain *in vivo* (Figure 7B) (8). We observed that (p)ppGpp induction  
263 alone had no effect on the small (Y/P<sub>2</sub>-T<sub>2</sub>; cyan dot) *rimM* transcript, whereas the two larger  
264 species (Y/P<sub>2</sub>-T<sub>3</sub> and P<sub>1</sub>-T<sub>3</sub>, pink and purple dots, respectively) were down-regulated as the  
265 expression of the (p)ppGpp reporter *ywaA* increased (Figure 7B). Although (p)ppGpp  
266 production alone recapitulated what was seen in RnpB-depleted cells, the fact that only the  
267 two larger transcripts behaved as expected from the results obtained in the RNase P-  
268 depleted ppGpp<sup>0</sup> strain (Figure 7A), suggests that regulation of the smallest transcript (Y/P<sub>2</sub>-  
269 T<sub>2</sub>) is more complex than simple transcriptional repression by (p)ppGpp.

270 The fact that the Y/P<sub>2</sub>-T<sub>2</sub> *rimM* transcript could be down-regulated independently of  
271 (p)ppGpp production led us to investigate the possibility of a further layer of regulation  
272 where the growth slow-down in tRNA maturase-depleted cells would also affect *rimM*  
273 expression by a mechanism independent of alarmone levels. To test this, we sought to  
274 reproduce the growth rate defect by depleting for an unrelated essential enzyme. We  
275 therefore performed Northern blot analysis on total RNA extracted from both RNase III (*rnc*)  
276 depletion and deletion strains. The double-strand specific endoribonuclease RNase III is  
277 essential in *B. subtilis* because it is required to silence expression of foreign toxin genes of  
278 two prophages (Skin and SPβ) (16). Whereas depletion of RNase III in a WT background leads  
279 to growth arrest, the *rnc* gene can be deleted in a strain lacking the two prophages without a  
280 marked effect on growth rate. The RNase III depleted strain showed only a very limited  
281 derepression of the CodY regulon in comparison with tRNA maturase-depleted strains  
282 (Figure 8A) and did not accumulate visible amounts of (p)ppGpp on thin-layer  
283 chromatography (TLC) (Figure 8B). This validates the use of RNase III depletion strains to  
284 examine the effect of growth rate on *rimM* expression and to distinguish this from the effect  
285 of accumulating high levels of (p)ppGpp. While RNase III deletion had no effect on *rimM*  
286 expression, all three *rimM*-containing transcripts were strongly down-regulated during  
287 RNase III depletion (Figure 8C), confirming that growth rate also plays a major role in the  
288 regulation of *rimM* expression, independently of (p)ppGpp and tRNA maturase depletion.

289

290 **Discussion**

291 This study began with the observation that depletion of tRNA maturase enzymes in *B.*  
292 *subtilis* led to a defect in 30S ribosome subunit assembly, which we showed was in part due  
293 to an accumulation of (p)ppGpp and an inhibition of the activity of 30S assembly GTPases  
294 (8). In our early attempts to understand the mechanism underlying this phenomenon, we  
295 studied the expression of several 30S assembly factors and discovered that most were either  
296 up or down-regulated at the mRNA level upon depletion of either RNase P or RNase Z.

297 We initially focused on the *rimM* mRNA because the 30S ribosome assembly defect  
298 observed in tRNA maturase depletion mutants was very similar to that seen in a  $\Delta rimM$   
299 strain. Although we later showed that ectopic *rimM* expression could not correct the  
300 assembly defect in the *rnpB*-depleted strain (8), we were nonetheless curious about how  
301 *rimM* expression was affected by the decrease in the levels of mature tRNAs. Together, our  
302 data (summarized in Figure S4) indicate that the down-regulation of *rimM* transcript levels in  
303 tRNA maturase-depleted cells is the result of a complex mixture of transcriptional and post-  
304 transcriptional mechanisms, caused by a combination of effects mediated by a reduction in  
305 growth rate, (p)ppGpp production and a translational defect due to lack of functional tRNAs,  
306 with each layer of regulation capable of functioning independently of the others and  
307 affecting the three *rimM* transcripts distinctly at different levels of severity.

308 We hypothesized that the accumulation of immature tRNAs during tRNA maturase  
309 depletion increases ribosome stalling. Stalled ribosomes are known to affect mRNA decay in  
310 bacteria (17) and a tRNA loss of function mutation leading to pre-tRNA processing defects  
311 was reported to induce ribosome stalling in mice (9). In agreement with our hypothesis, we  
312 observed that treatment with the translation elongation inhibitor chloramphenicol at MIC  
313 concentrations recapitulates the effects of tRNA maturase depletion on the mRNA levels of  
314 several different assembly factor mRNAs tested, four of which were up-regulated (*era*, *yqeH*,  
315 *ydaF* and *yjck*) and two down-regulated (*rimM* and *cpgA*). Interestingly, Cm treatment at  
316 sub-inhibitory concentrations did not impact cofactor mRNA levels in the same way, with  
317 low Cm concentrations initially having transitory up-effects that were then reversed at  
318 longer incubation times. One possibility is that short ribosome stalls transiently block access  
319 to cleavage sites by housekeeping RNases such as RNase Y, resulting in mRNA stabilization,  
320 while prolonged stalling could lead to mRNA destabilisation by an enzyme such as Rae1,  
321 proposed to enter the A-site of stalled ribosomes (2), or by leaving large stretches of mRNA  
322 unoccupied by ribosomes and vulnerable to cleavage by canonical degradation pathways.

323 Another notable difference between the two conditions is that the stringent response is  
324 induced by Cm at MIC, as evidenced by the increase in expression the *ilvA* mRNA from the  
325 CodY regulon (Figure S5), which could also contribute the increased severity of the response  
326 to higher Cm concentrations. Activation of the stringent response in Cm-treated *B. subtilis*  
327 was also previously observed by (18), consistent with our results. This is a marked difference  
328 from *E. coli*, where Cm is a known inhibitor of stringent response induction (19, 20). The  
329 mechanism still remains elusive in both cases.

330 Beyond their canonical role in protein synthesis, tRNAs have been implicated in the  
331 regulation of several biological processes (for review, see (21, 22)). A new class of small non-  
332 coding RNAs has emerged recently called tRNA-derived fragments (tRFs) or tRNA-derived  
333 small RNAs, whose biological roles are not yet well understood (23). Different types of tRFs  
334 differ in the cleavage position of the mature or precursor tRNA transcript. They have been  
335 particularly studied in humans, where they have been shown to be involved in regulation of  
336 a variety of cellular processes, including global translation, cellular proliferation, apoptosis  
337 and epigenetic inheritance (24). Interestingly, a 3'-tRF in human cells plays an essential role  
338 in fine-tuning ribosome biogenesis under normal physiological conditions by post-  
339 transcriptionally regulating translation of at least two r-protein mRNAs (25). Although tRFs  
340 have not yet been identified in *B. subtilis*, we asked whether pre-tRNAs could bind certain  
341 assembly factor mRNAs *via* their 5' or 3' extensions and cause some of the post-  
342 transcriptional effects observed in the tRNA maturase depletion strains. tRFs with 5' or 3'  
343 extensions (pre-tRFs) could similarly behave as a new pool of potential regulatory sRNAs.  
344 Although the potential base-pairing we identified between the 5' extension of *trnD-Tyr* and  
345 the *rimM* transcripts does not seem to play a role in the down-regulation of *rimM*  
346 expression, this doesn't preclude the possibility that other pre-tRNAs or pre-tRFs could be  
347 involved in post-transcriptional regulatory events in *B. subtilis*.

348 A recent study in *E. coli* showed that the abundance of 46% of transcripts were affected  
349 in a strain where the protein moiety of RNase P was heat denatured (26). The observation  
350 that the addition of chloramphenicol mimicked the effect of tRNA maturase depletion in *B.*  
351 *subtilis* for the upregulated mRNAs, and that down-regulation was the net result of a  
352 mixture of translational and transcriptional effects, suggests that the effects seen on the *E.*  
353 *coli* transcriptome may substantially be the result of ribosome stalling on mRNAs due to lack  
354 of functional tRNAs, with differential impacts (up, down or neutral) on individual mRNA

355 stabilities or transcription levels. More detailed studies are required to untangle these  
356 effects on a global level in both organisms.

357

### 358 **Acknowledgements**

359 This work was supported by funds from the CNRS (UMR 8261), Université Paris Cité, the  
360 Agence Nationale de la Recherche (ANR-QC). This work has been published under the  
361 framework of Equipex (Cacsice) and LABEX (Dynamo) programs that benefit from a state  
362 funding managed by the French National Research Agency as part of the Investments for the  
363 Future program. We thank lab members for helpful discussion.

## 364 **Materials and Methods**

365

### 366 **Strains and culture conditions**

367 All *B. subtilis* strains used were derived from our laboratory strain SSB1002, a W168  
368 *trp*<sup>+</sup> prototrophic strain. Strains are listed in Table S1 and details of strains and plasmid  
369 constructs are provided in Table S2 and S3, respectively. Oligonucleotides used are listed in  
370 Table S4.

371 Unless stated otherwise, *B. subtilis* strains were grown in 2xYT liquid medium (1.6%  
372 peptone, 1% yeast extract, 1% NaCl) at 200 rpm at 37°C in ≤ 1/10 volume of the flask to  
373 ensure proper aeration. Overnight precultures were grown in presence of appropriate  
374 antibiotics and inducer (1mM IPTG or 2% xylose), in the case of depletion strains.  
375 Experimental cultures were grown in the absence of antibiotics, except where stated. For  
376 depletion strains, overnight induced cultures were washed three times with pre-warmed  
377 2xYT medium and inoculated at OD<sub>600</sub> between 0.02 and 0.2, depending on the strain, in  
378 fresh medium with or without inducer. Generally, induced cells were harvested for RNA  
379 preparation around OD<sub>600</sub> = 0.6 and cells grown in the absence of the inducer were followed  
380 until they reach a plateau before being harvested. Inoculation and depletion conditions were  
381 determined empirically for each strain such that the depleted cells were harvested between  
382 OD<sub>600</sub> = 0.3 and 0.7. For RnpA depletion, cultures were inoculated at OD<sub>600</sub> = 0.05 in presence  
383 of 2% xylose (inducer) or 2% glucose to tighten repression of the *P<sub>xyl</sub>* promoter, which  
384 typically led to a growth arrest (plateau) around OD<sub>600</sub> = 0.6. For *rnz* and *rnpB* depletion  
385 strains, cultures were inoculated in presence or in absence of 1mM IPTG at OD<sub>600</sub> = 0.05 and  
386 OD<sub>600</sub> = 0.2, respectively. RNase Z and RnpB depleted cells typically plateau around OD<sub>600</sub> =  
387 0.6 and OD<sub>600</sub> = 0.3, respectively.

388 For rifampicin experiments, *B. subtilis* strains were grown in 2xTY at 37°C with shaking as  
389 described above. At OD<sub>600nm</sub> = 0.6 (or less for some depletion strains), rifampicin was added  
390 to a final concentration of 150 µg/mL in order to block new RNA synthesis. Samples were  
391 collected at different time points (e. g. 0, 2, 5, 10, 15 and 20 minutes) by mixing the cells  
392 with frozen 10 mM sodium azide (200 µL for 1.3 mL culture). Samples were vortexed until  
393 the sodium azide thawed, cells were pelleted by centrifugation at 4°C and the pellet was  
394 conserved at -20°C until RNA extraction.

395 To mimic amino acid starvation, we depleted charged arginine tRNAs by addition of  
396 arginine hydroxamate (RHX) at 250 mg/mL in cultures growing in 2xTY at OD<sub>600</sub> = 0.3.

397 To study the effect of translation pausing, we added the translation elongation inhibitor  
398 chloramphenicol (Cm) at sub-inhibitory (2.5 µg/ml) or minimal inhibitory concentration (5  
399 µg/ml) to cells growing in 2xYT at OD<sub>600</sub> = 0.6. Cells were harvested just before Cm addition  
400 (t<sub>0</sub>) and 15, 30 and 60 mins after treatment.

401 To reproduce some growth conditions from the *B. subtilis* tiling array experiment (10) known  
402 to lead to a decrease in *rnvA* expression, ethanol was added to cultures growing in minimal  
403 medium (M9 with 0.5 % glucose) at 4% (v/v) around OD<sub>600</sub> = 0.4 and cells were harvested 10  
404 mins after treatment.

405

#### 406 **Plasmid constructs**

407 The *rimM* gene was amplified by PCR using oligo pair (CC2034/CC1986) and cloned between  
408 the BamHI and XhoI sites of the integrative pHM2-Pspac(con) vector (Table S3). The  
409 bicistronic *ylqD-rimM* construct was amplified by PCR using oligo pair (CC1985/CC1986) and  
410 cloned between the BamHI and Sall sites of pHM2-Pspac(con). The mutated construct *ylqD*\*-  
411 *rimM* was obtained by two-fragment overlapping PCR. The upstream fragment was  
412 amplified with the forward primer CC1985 and the reverse primer CC2012 and the  
413 downstream fragment with the forward primer CC2011 and the reverse primer CC1986. The  
414 overlapping fragments were reamplified using oligo pair CC1985/CC1986 and cloned  
415 between the BamHI and Sall sites of pHM2-Pspac(con). The integrative plasmids were  
416 linearized with XbaI before transformation, for integration into the *amyE* locus of the *B.*  
417 *subtilis* chromosome.

418

#### 419 **RNA extraction and Northern blots**

420 RNA extraction was typically performed using the glass beads/phenol protocol  
421 (adapted from (27)) on 1 to 8 mL mid-log phase *B. subtilis* cells growing in 2xYT.

422 To perform Northern blots, 5 µg total RNA were denatured for 5 mins at 95°C in RNA  
423 Gel loading dye (Thermo Scientific) before being separated on 1% agarose gels in 1X TBE  
424 (native) or on denaturing 5% acrylamide gels in 1X TBE + 7M urea. RNA was transferred from

425 agarose gels to a hybond-N membrane (GE-Healthcare) by capillary transfer for 4 hours  
426 minimum in 1X transfer buffer (5X SSC, 0.01M NaOH). For Northern blots of acrylamide gels, RNA  
427 was electro-transferred at 4°C in 0.5X TBE for 4 hours at 60V or overnight at 12V. RNA was  
428 cross-linked to the membrane by UV cross-linking at 120,000 microjoules/cm<sup>2</sup> using HL-200  
429 Hybrilinker UV-crosslinker (UVP). Probes for Northern blots were usually 25 to 30-nt DNA  
430 oligonucleotides radiolabeled on their 5' end by polynucleotide kinase. The *cpgA* mRNA was  
431 detected using a riboprobe using a PCR fragment amplified using oligos CC2200 and CC2201  
432 as template. Membranes were pre-incubated in Ultra-Hyb (Life Technologies) for agarose  
433 blots or Roti-Hybri-Quick (Roth) for acrylamide blots for 1 hour and hybridized with  
434 radiolabeled probes for a minimum of 4 hours. Pre-incubation, hybridization and wash steps  
435 were performed at 42°C in the case of 5'-labeled oligonucleotides or at 68°C for riboprobes.  
436 Membranes were quickly rinsed once at room temperature in 2x SSC 0.1% SDS to remove  
437 non-hybridized probe before being washed once for 5 mins in the same buffer and then  
438 twice for 5 mins in 0.2x SSC 0.1% SDS. Northern blots were exposed to PhosphorImager screens  
439 (GE Healthcare) and the signal was obtained by scanning with a Typhoon scanner (GE  
440 Healthcare) and analyzed by Fiji (ImageJ) software.

441

#### 442 **Thin layer chromatography (TLC)**

443 TLC analysis was used to detect radiolabeled (p)ppGpp as described in (8).

444

445



## 446 References

- 447 1. **Condon C, Bechhofer DH.** 2011. Regulated RNA stability in the Gram positives. *Curr*  
448 *Opin Microbiol* 14:148-54.
- 449 2. **Leroy M, Piton J, Gilet L, Pellegrini O, Proux C, Coppee JY, Figaro S, Condon C.** 2017.  
450 *Rae1/YacP, a new endoribonuclease involved in ribosome-dependent mRNA decay in*  
451 *Bacillus subtilis.* *EMBO J* 36:1167-1181.
- 452 3. **Condon C, Piton J, Braun F.** 2018. Distribution of the ribosome associated  
453 endonuclease *Rae1* and the potential role of conserved amino acids in codon  
454 recognition. *RNA Biol* doi:10.1080/15476286.2018.1454250:1-6.
- 455 4. **Braun F, Condon C.** 2019. RNA processing, p 164-177 *In* Schmidt TM (ed),  
456 *Encyclopedia of Microbiology*, 4th edition doi:10.1016/B978-0-12-801238-3.02455-7.  
457 Elsevier.
- 458 5. **Wen T, Oussenko IA, Pellegrini O, Bechhofer DH, Condon C.** 2005. Ribonuclease PH  
459 plays a major role in the exonucleolytic maturation of CCA-containing tRNA  
460 precursors in *Bacillus subtilis*. *Nucleic Acids Res* 33:3636-43.
- 461 6. **Pellegrini O, Li de la Sierra-Gallay I, Piton J, Gilet L, Condon C.** 2012. Activation of  
462 tRNA maturation by downstream uracil residues in *B. subtilis*. *Structure* 20:1769-77.
- 463 7. **Marks J, Kannan K, Roncase EJ, Klepacki D, Kefi A, Orelle C, Vazquez-Laslop N,**  
464 **Mankin AS.** 2016. Context-specific inhibition of translation by ribosomal antibiotics  
465 targeting the peptidyl transferase center. *Proc Natl Acad Sci U S A* 113:12150-12155.
- 466 8. **Trinquier A, Ulmer JE, Gilet L, Figaro S, Hammann P, Kuhn L, Braun F, Condon C.**  
467 2019. tRNA Maturation Defects Lead to Inhibition of rRNA Processing via Synthesis of  
468 pppGpp. *Mol Cell* 74:1227-1238 e3.
- 469 9. **Ishimura R, Nagy G, Dotu I, Zhou H, Yang XL, Schimmel P, Senju S, Nishimura Y,**  
470 **Chuang JH, Ackerman SL.** 2014. RNA function. Ribosome stalling induced by  
471 mutation of a CNS-specific tRNA causes neurodegeneration. *Science* 345:455-9.
- 472 10. **Nicolas P, Mader U, Dervyn E, Rochat T, Leduc A, Pigeonneau N, Bidnenko E,**  
473 **Marchadier E, Hoebeke M, Aymerich S, Becher D, Bisicchia P, Botella E, Delumeau**  
474 **O, Doherty G, Denham EL, Fogg MJ, Fromion V, Goelzer A, Hansen A, Hartig E,**  
475 **Harwood CR, Homuth G, Jarmer H, Jules M, Klipp E, Le Chat L, Lecoite F, Lewis P,**  
476 **Liebermeister W, March A, Mars RA, Nannapaneni P, Noone D, Pohl S, Rinn B,**  
477 **Rugheimer F, Sappa PK, Samson F, Schaffer M, Schwikowski B, Steil L, Stulke J,**  
478 **Wiegert T, Devine KM, Wilkinson AJ, van Dijl JM, Hecker M, Volker U, Bessieres P,**  
479 **et al.** 2012. Condition-dependent transcriptome reveals high-level regulatory  
480 architecture in *Bacillus subtilis*. *Science* 335:1103-6.
- 481 11. **DeLoughery A, Lalanne JB, Losick R, Li GW.** 2018. Maturation of polycistronic mRNAs  
482 by the endoribonuclease RNase Y and its associated Y-complex in *Bacillus subtilis*.  
483 *Proc Natl Acad Sci U S A* 115:E5585-E5594.
- 484 12. **Kery MB, Feldman M, Livny J, Tjaden B.** 2014. TargetRNA2: identifying targets of  
485 small regulatory RNAs in bacteria. *Nucleic Acids Res* 42:W124-9.
- 486 13. **Murray HD, Schneider DA, Gourse RL.** 2003. Control of rRNA expression by small  
487 molecules is dynamic and nonredundant. *Mol Cell* 12:125-34.
- 488 14. **VanBogelen RA, Kelley PM, Neidhardt FC.** 1987. Differential induction of heat shock,  
489 SOS, and oxidation stress regulons and accumulation of nucleotides in *Escherichia*  
490 *coli*. *J Bacteriol* 169:26-32.

- 491 15. **Kriel A, Bittner AN, Kim SH, Liu K, Tehranchi AK, Zou WY, Rendon S, Chen R, Tu BP,**  
492 **Wang JD.** 2012. Direct regulation of GTP homeostasis by (p)ppGpp: a critical  
493 component of viability and stress resistance. *Mol Cell* 48:231-41.
- 494 16. **Durand S, Gilet L, Condon C.** 2012. The essential function of *B. subtilis* RNase III is to  
495 silence foreign toxin genes. *PLoS Genet* 8:e1003181.
- 496 17. **Deana A, Belasco JG.** 2005. Lost in translation: the influence of ribosomes on  
497 bacterial mRNA decay. *Genes Dev* 19:2526-33.
- 498 18. **Rhaese HJ, Dichtelmuller H, Grade R.** 1975. Studies on the control of development.  
499 Accumulation of guanosine tetraphosphate and pentaphosphate in response to  
500 inhibition of protein synthesis in *Bacillus subtilis*. *Eur J Biochem* 56:385-92.
- 501 19. **Cashel M.** 1969. The control of ribonucleic acid synthesis in *Escherichia coli*. IV.  
502 Relevance of unusual phosphorylated compounds from amino acid-starved stringent  
503 strains. *J Biol Chem* 244:3133-41.
- 504 20. **Kurland CG, Maaloe O.** 1962. Regulation of ribosomal and transfer RNA synthesis. *J*  
505 *Mol Biol* 4:193-210.
- 506 21. **Katz A, Elgamal S, Rajkovic A, Ibba M.** 2016. Non-canonical roles of tRNAs and tRNA  
507 mimics in bacterial cell biology. *Mol Microbiol* 101:545-58.
- 508 22. **Raina M, Ibba M.** 2014. tRNAs as regulators of biological processes. *Front Genet*  
509 5:171.
- 510 23. **Lee YS, Shibata Y, Malhotra A, Dutta A.** 2009. A novel class of small RNAs: tRNA-  
511 derived RNA fragments (tRFs). *Genes Dev* 23:2639-49.
- 512 24. **Kumar P, Kuscu C, Dutta A.** 2016. Biogenesis and Function of Transfer RNA-Related  
513 Fragments (tRFs). *Trends Biochem Sci* 41:679-689.
- 514 25. **Kim HK, Fuchs G, Wang S, Wei W, Zhang Y, Park H, Roy-Chaudhuri B, Li P, Xu J, Chu**  
515 **K, Zhang F, Chua MS, So S, Zhang QC, Sarnow P, Kay MA.** 2017. A transfer-RNA-  
516 derived small RNA regulates ribosome biogenesis. *Nature* 552:57-62.
- 517 26. **Mohanty BK, Kushner SR.** 2022. Inactivation of RNase P in *Escherichia coli*  
518 significantly changes post-transcriptional RNA metabolism. *Mol Microbiol* 117:121-  
519 142.
- 520 27. **Bechhofer DH, Oussenko IA, Deikus G, Yao S, Mathy N, Condon C.** 2008. Analysis of  
521 mRNA decay in *Bacillus subtilis*. *Methods Enzymol* 447:259-76.
- 522 28. **Wegscheid B, Condon C, Hartmann RK.** 2006. Type A and B RNase P RNAs are  
523 interchangeable in vivo despite substantial biophysical differences. *EMBO Rep* 7:411-  
524 7.
- 525 29. **Koo BM, Kritikos G, Farelli JD, Todor H, Tong K, Kimsey H, Wapinski I, Galardini M,**  
526 **Cabal A, Peters JM, Hachmann AB, Rudner DZ, Allen KN, Typas A, Gross CA.** 2017.  
527 Construction and Analysis of Two Genome-Scale Deletion Libraries for *Bacillus*  
528 *subtilis*. *Cell Syst* 4:291-305 e7.
- 529 30. **Chary VK, Amaya EI, Piggot PJ.** 1997. Neomycin- and spectinomycin-resistance  
530 replacement vectors for *Bacillus subtilis*. *FEMS Microbiol Lett* 153:135-9.
- 531 31. **Gendron N, Putzer H, Grunberg-Manago M.** 1994. Expression of both *Bacillus subtilis*  
532 threonyl-tRNA synthetase genes is autogenously regulated. *J Bacteriol* 176:486-494.

534

535 **Figure Legends**

536 **Figure 1.** Depletion of tRNA processing enzymes results in perturbed expression of some  
537 mRNAs encoding proteins involved in 30S subunit assembly. Northern blots showing (A) Up-  
538 regulated mRNAs, (B) Down-regulated mRNAs (C) Unaffected mRNAs and (D) mRNAs  
539 unrelated to ribosome assembly, present in total mRNA isolated in the presence or absence  
540 of inducer as indicated. Note that the basal level of the *bmrCD* transcript, encoding a  
541 multidrug transporter, is higher in the *Pspac-rnz* and *Pspac-rnpB* strains because of the  
542 presence of erythromycin in the medium for stable maintenance of the construct. 16S rRNA  
543 levels (ethidium bromide stained) are shown as a loading control. Series of blots where a  
544 single loading control is shown, were stripped and reprobated. The blots for *era*, *yqeH*, *rimM*  
545 and *cpgA* were regenerated as in ref. (8) with independent RNA preparations, with  
546 permission granted by the publisher for re-use of previously published data. Number of  
547 repetitions (n) as follows: *yqeH* (n=3); *era* (n=3); *rpsU* (n=4); *ydaF* (n=2); *yjck* (n=2); *rimM*  
548 (n=3); *cpgA* (n=3); *rbfA* (n=2); *ylxS* (n=2); *yfmL* (n=2); *bmrCD* (n=2); *yrzI* (n=2).

549

550 **Figure 2.** Up-regulated mRNAs show increased stability upon tRNA maturase depletion and  
551 increased expression levels in the presence of chloramphenicol. Northern blots of total RNA  
552 isolated at different times after addition of rifampicin (Rif) in cells grown in the presence or  
553 absence of inducer for (A) *rnpB* or (B) *rnpA* expression. Transcript sizes are given in kb to the  
554 left of the blots and half-lives are reported under each blot. Note, that since *yjck* gives no  
555 signal in the presence of inducer, we cannot rule out a transcriptional effect in this case. (C)  
556 Northern blots of total RNA isolated at different times after addition of 0.5x MIC and MIC of  
557 chloramphenicol (Cm). 16S rRNA levels (ethidium bromide stained) are shown as a loading  
558 control. Series of blots where a single loading control is shown, were stripped and reprobated.  
559 Experiments were performed twice, with decay plots and their quantifications given in  
560 Figure S1.

561

562 **Figure 3.** Downregulated mRNAs are subjected to a mixture of transcriptional and post-  
563 transcriptional effects upon tRNA maturase depletion and chloramphenicol addition.  
564 Northern blots of total RNA isolated at different times after addition of rifampicin (Rif) in  
565 cells grown in the presence or absence of inducer for (A) *rnpB* or (B) *rnpA* expression.

566 Transcript sizes are given in kb to the left of the blot and half-lives are reported under each  
567 blot. (C) Northern blots of total RNA isolated at different times after addition of 0.5x MIC  
568 and MIC of chloramphenicol (Cm). 16S rRNA levels (ethidium bromide stained) are shown as  
569 a loading control. Series of blots where a single loading control is shown, were stripped and  
570 reprobed. Blots shown in Fig. 2 were stripped and reprobed for use in this figure.  
571 Experiments were performed twice, with decay plots and their quantifications given in  
572 Figure S2.

573

574 **Figure 4.** Three of the six transcripts emanating from the *rimM* operon are sensitive to tRNA  
575 maturase depletion. (A) Structure of the *rimM* operon. Open reading frames (ORFs; not to  
576 scale) are shown as gray arrows and transcripts as different colored wavy lines. Sizes are as  
577 indicated. Promoters (P<sub>1</sub>-P<sub>3</sub>) are represented by black arrows and terminators (T<sub>1</sub>-T<sub>3</sub>) as  
578 hairpins. A known RNase Y cleavage site is indicated by a scissors symbol. The asterisk  
579 indicates transcripts that may be processed by RNase Y, but are not distinguishable from P<sub>2</sub>  
580 primary transcripts by Northern blot. These are denoted Y/P2 in the text. (B) Northern blot  
581 analysis of total RNA from *Pxyl-rnpA* cells grown in the presence or absence of inducer,  
582 probed with oligonucleotides targeting different ORFs of the operon (indicated below  
583 panel). Colored dots correspond to the colors of the transcripts shown in panel A.

584

585 **Figure 5.** A determinant for down regulation of the *rimM* operon in response to tRNA  
586 maturase depletion is located within the *ylqD* ORF. (A) Northern blot of total RNA from  
587 *Pspac-rnpB* cells isolated in the presence or absence of IPTG showing the effect of RnpB-  
588 depletion on expression of an ectopic *ylqD-rimM* short operon containing a wt or mutated  
589 (\*) potential target sequence for *trnD-Tyr* pre-tRNA within the *ylqD* ORF. Colored dots  
590 identifying endogenous *rimM* transcripts follow the same code as in Figure 4. (B) Schematic  
591 of ectopic *ylqD-rimM* constructs placed under control of the constitutive promoter (P) used  
592 in panel A. The zoom in shows the complementarity to the *trnD-Tyr* pre-tRNA and its  
593 disruption in the *ylqD\*-rimM* mutant construct. Coordinates are relative to the start codon  
594 of *rimM*. (C) Northern blot showing the effect of RNase P depletion (*rnpA* or *rnpB*) on  
595 expression of an ectopic *rimM*-only construct. (D) Schematic of ectopic *rimM* construct  
596 placed under control of the constitutive promoter (P) used in panel C. Slower migrating

597 bands (marked with an asterisk) are likely due to read-through of the terminator in the  
598 ectopic construct. 16S rRNA levels (ethidium bromide stained) are shown as a loading  
599 control.

600

601 **Figure 6.** Ethanol stress and stationary phase affect *rnpA* and *rnpB* expression without  
602 causing tRNA processing defects. (A) *rnpB* (black) and *rnpA* (red) transcript levels over 100  
603 different growth conditions (from ref. (10)). The three conditions indicated in yellow  
604 (ethanol stress and stationary phase in complex and minimal medium) result in reduced  
605 *rnpA* RNA levels. For each condition, *rnpA* and *rnpB* RNA levels (log<sub>2</sub>) are indicated in the  
606 yellow box. (B) Northern blot comparing *rnpB* (first panel, acrylamide gel because of small  
607 size, 401 nts), *rnpA* and *rimM* (second and third panel, agarose gel) RNA levels, after ethanol  
608 addition (EtOH) or during exponential (Exp) or stationary (Stat) phase in minimum (MM) or  
609 complex (2xTY) medium. Colored dots identifying *rimM* transcripts follow the same code as  
610 in Figure 4. Note that the 16S rRNA (loading control) is beginning to be degraded in MM  
611 stationary phase. (C) Northern blot probed for *trnJ-Lys* (acrylamide gel) showing no pre-tRNA  
612 accumulation in the different conditions tested. See Figure S1 of ref. (8) for accumulation of  
613 *trnJ-Lys* precursors under conditions of RnpA and RnpB depletion.

614

615 **Figure 7.** Influence of (p)ppGpp on *rimM* expression. (A) Northern blot comparing the effect  
616 of RNase P depletion (RnpB or RnpA) on *rimM* expression in a wt and (p)ppGpp<sup>0</sup> background.  
617 (B) Northern blot of *rimM* expression after induction of (p)ppGpp production using a xylose  
618 inducible *ywaC* in a  $\Delta yjbM ywaC relA$  ((p)ppGpp<sup>0</sup>) background. Colored dots identifying *rimM*  
619 transcripts follow the same code as in Figure 4. 16S rRNA levels (ethidium bromide stained)  
620 are shown as a loading control. Series of blots where a single loading control is shown, were  
621 stripped and re-probed. Note that this Northern blot was generated by re-probing a  
622 membrane previously used in ref. (8), with permission to re-use the *ywaA* control panel  
623 granted by the publisher.

624

625 **Figure 8.** Expression of the *rimM* operon is regulated by growth rate independent of  
626 (p)ppGpp. (A) Northern blot comparing the effect of RNase III deletion, and RNase P or  
627 RNase III depletion on derepression of the CodY-regulated *ywaA* mRNA. (B) RNase III-

628 depleted cells do not accumulate large amounts of (p)ppGpp compared to tRNA maturase  
629 depleted ones. Thin-layer chromatography (TLC) analysis of <sup>32</sup>P-labeled nucleotides  
630 extracted from RNase III-depleted cells (*rnc*). Arginine hydroxamate (RHX; 250mg/mL) was  
631 added to wt and (p)ppGpp<sup>0</sup> strains as positive and negative controls. The top and bottom  
632 halves are exposed for different times. Note that this is a re-crop of an image previously  
633 published in ref. (8); the first four (control) lanes are reshown to show the migration position  
634 of (p)ppGpp, with permission from the publisher. (C) Northern blot comparing the effect of  
635 RNase III depletion or deletion on *rimM* expression. Colored dots identifying *rimM*  
636 transcripts follow the same code as in Figure 4. 16S rRNA levels (ethidium bromide stained)  
637 are shown as a loading control.  
638



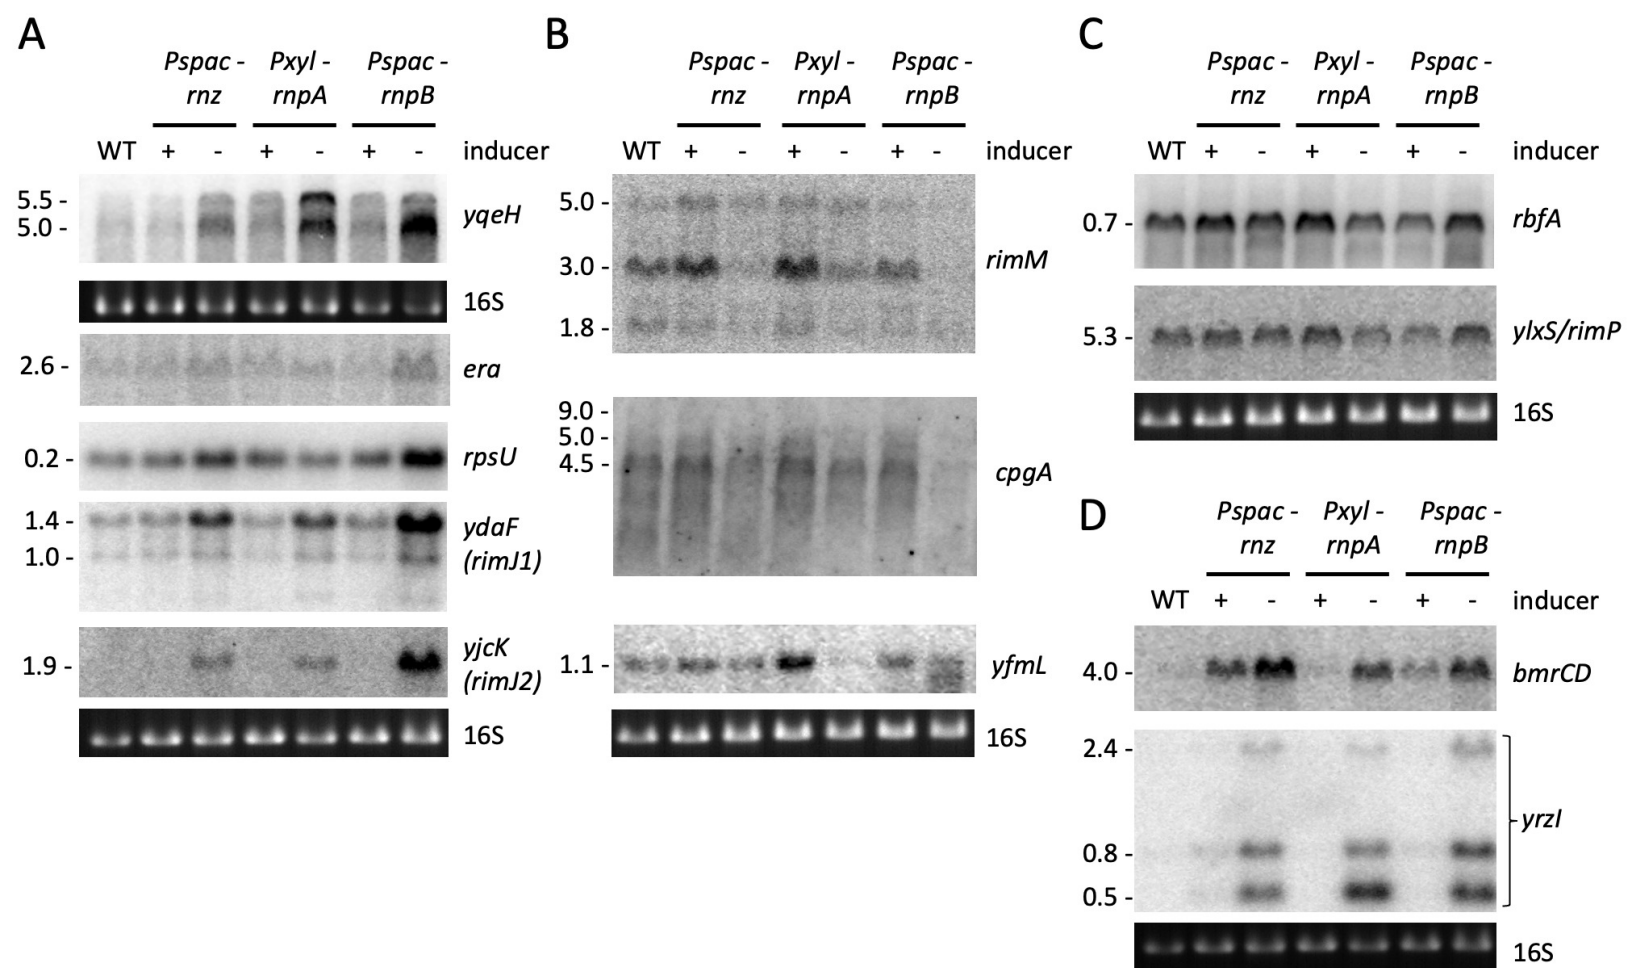

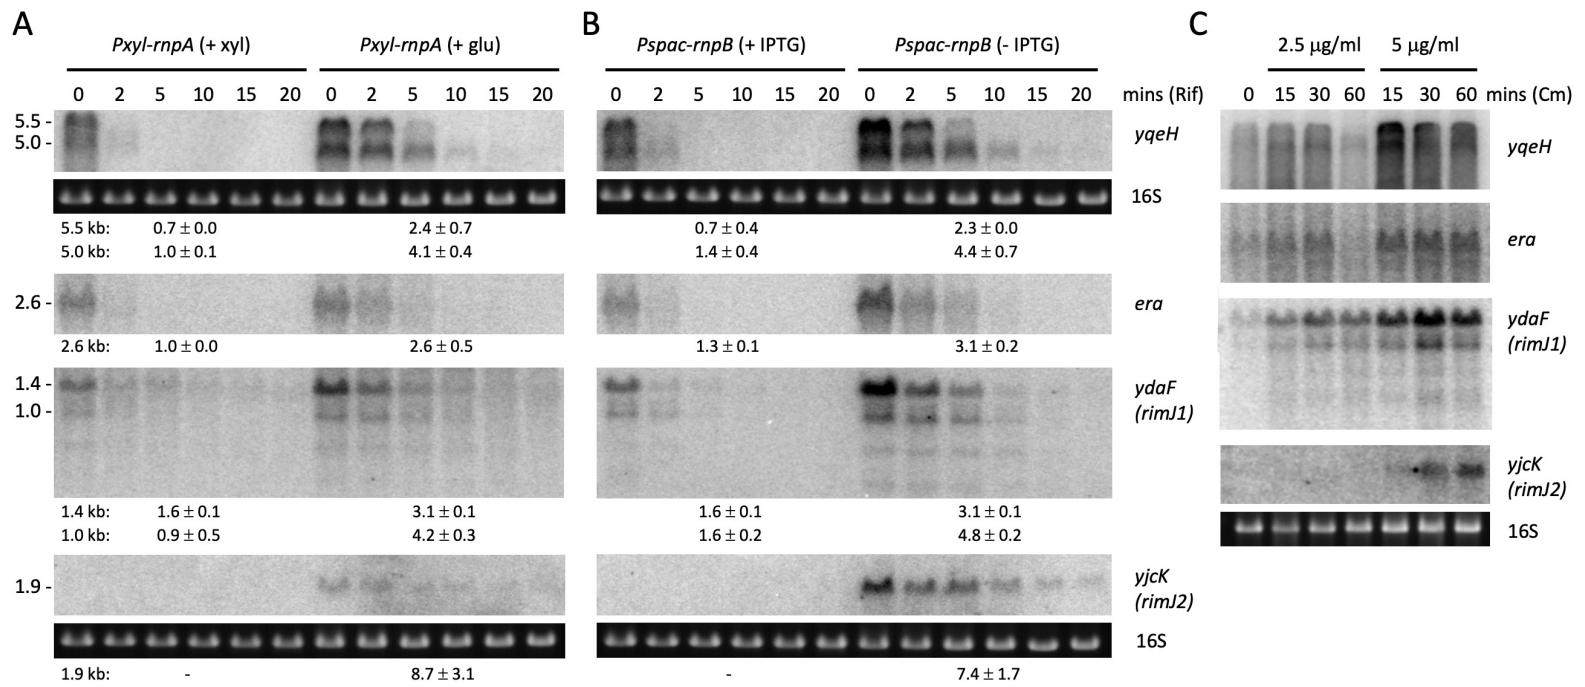



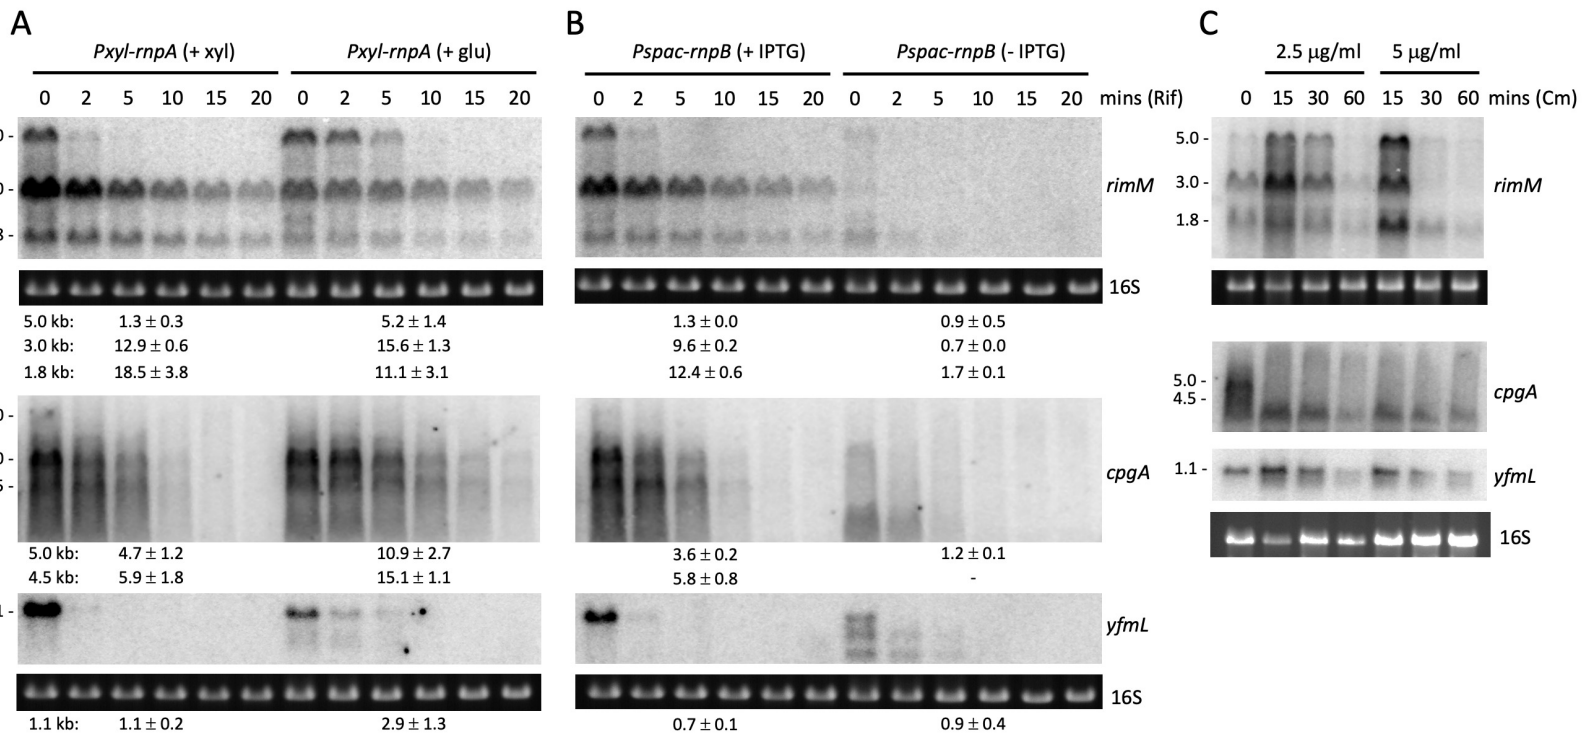

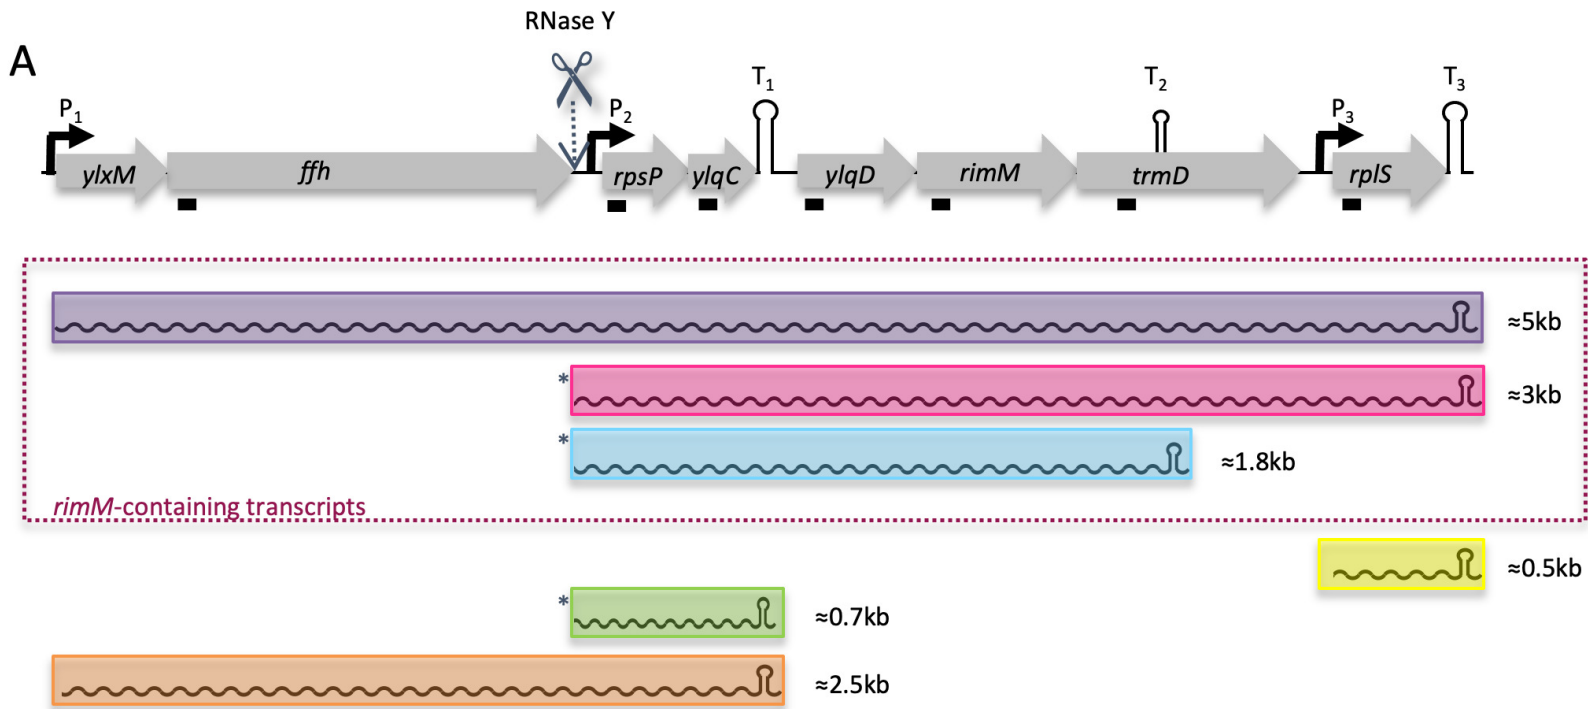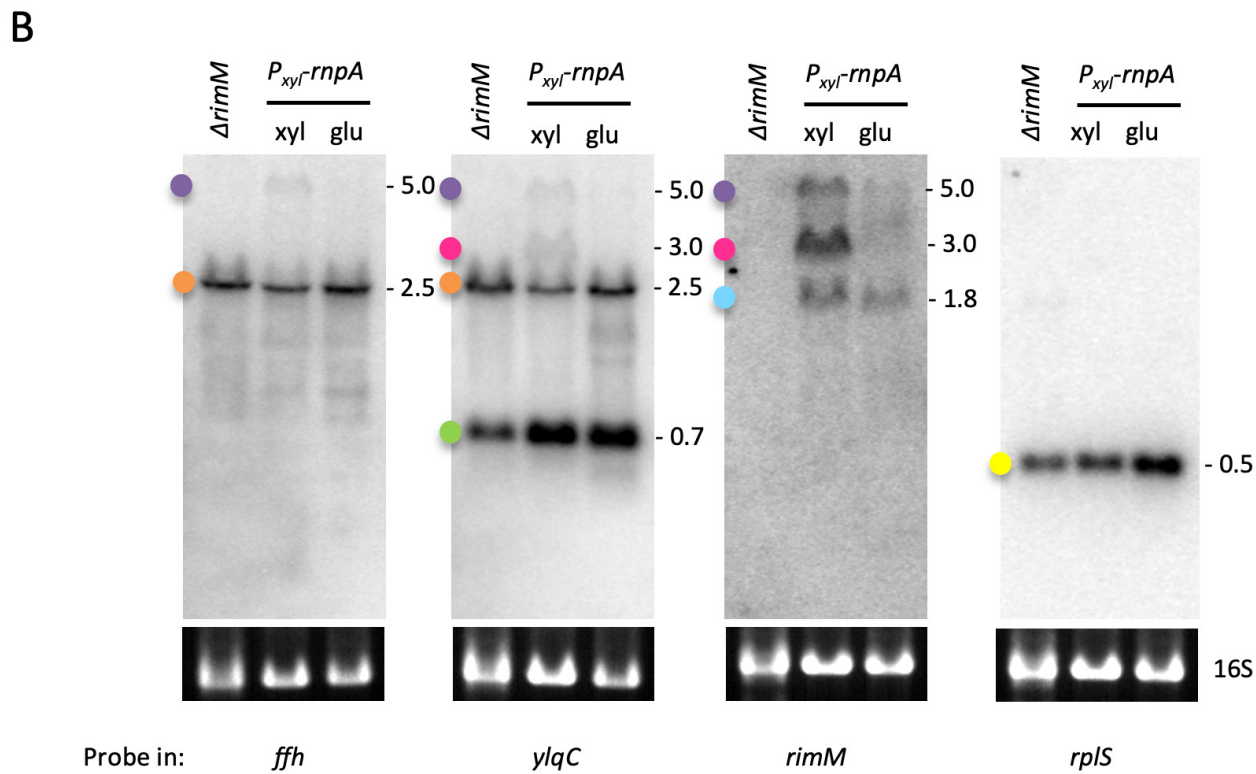

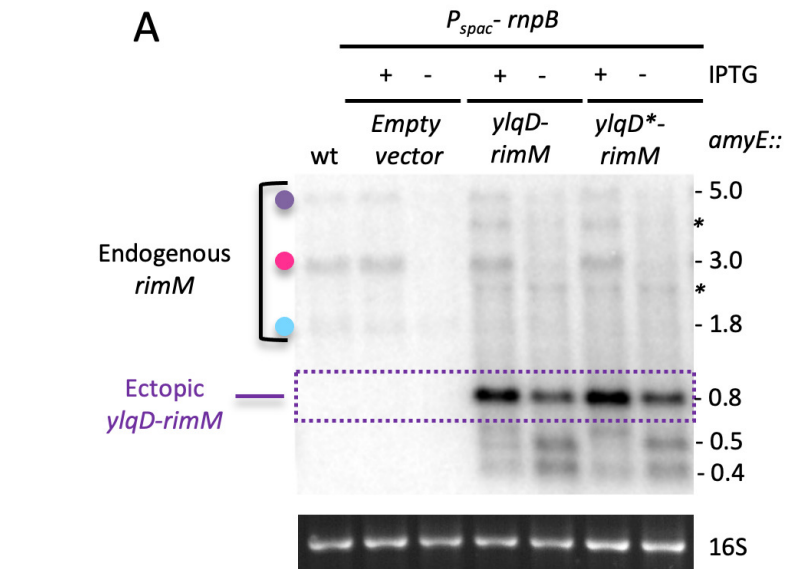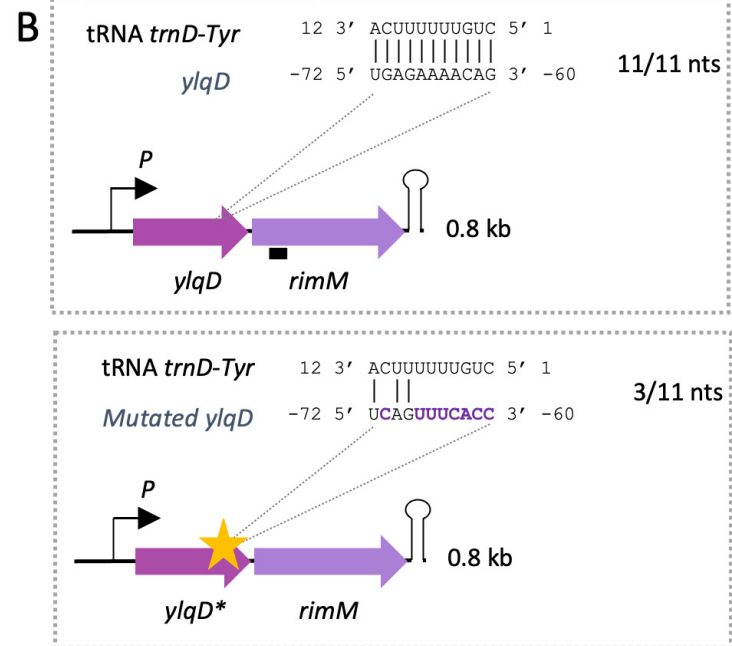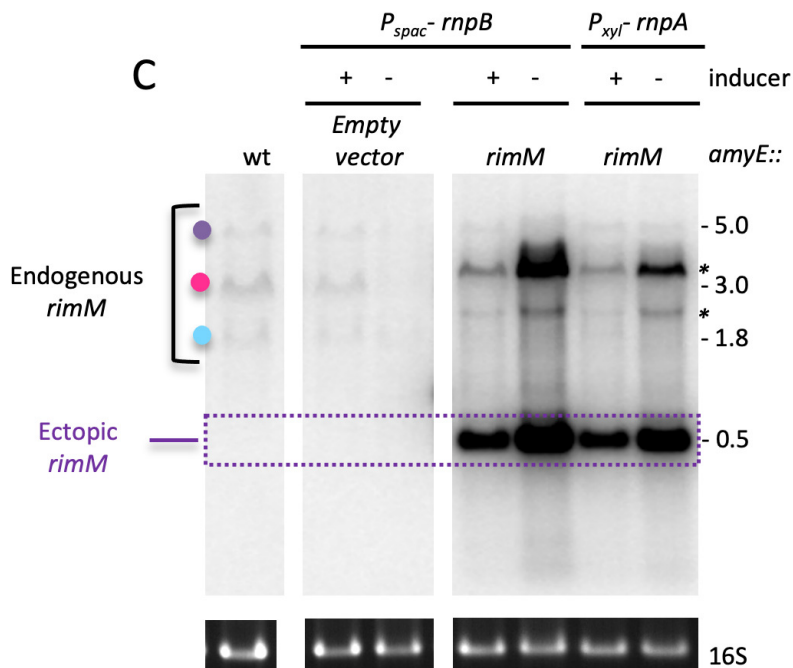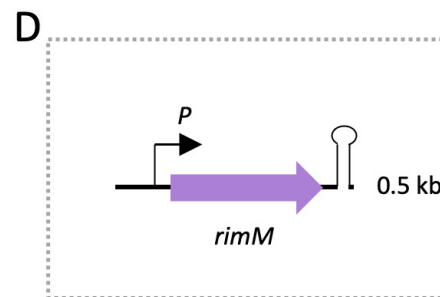

A

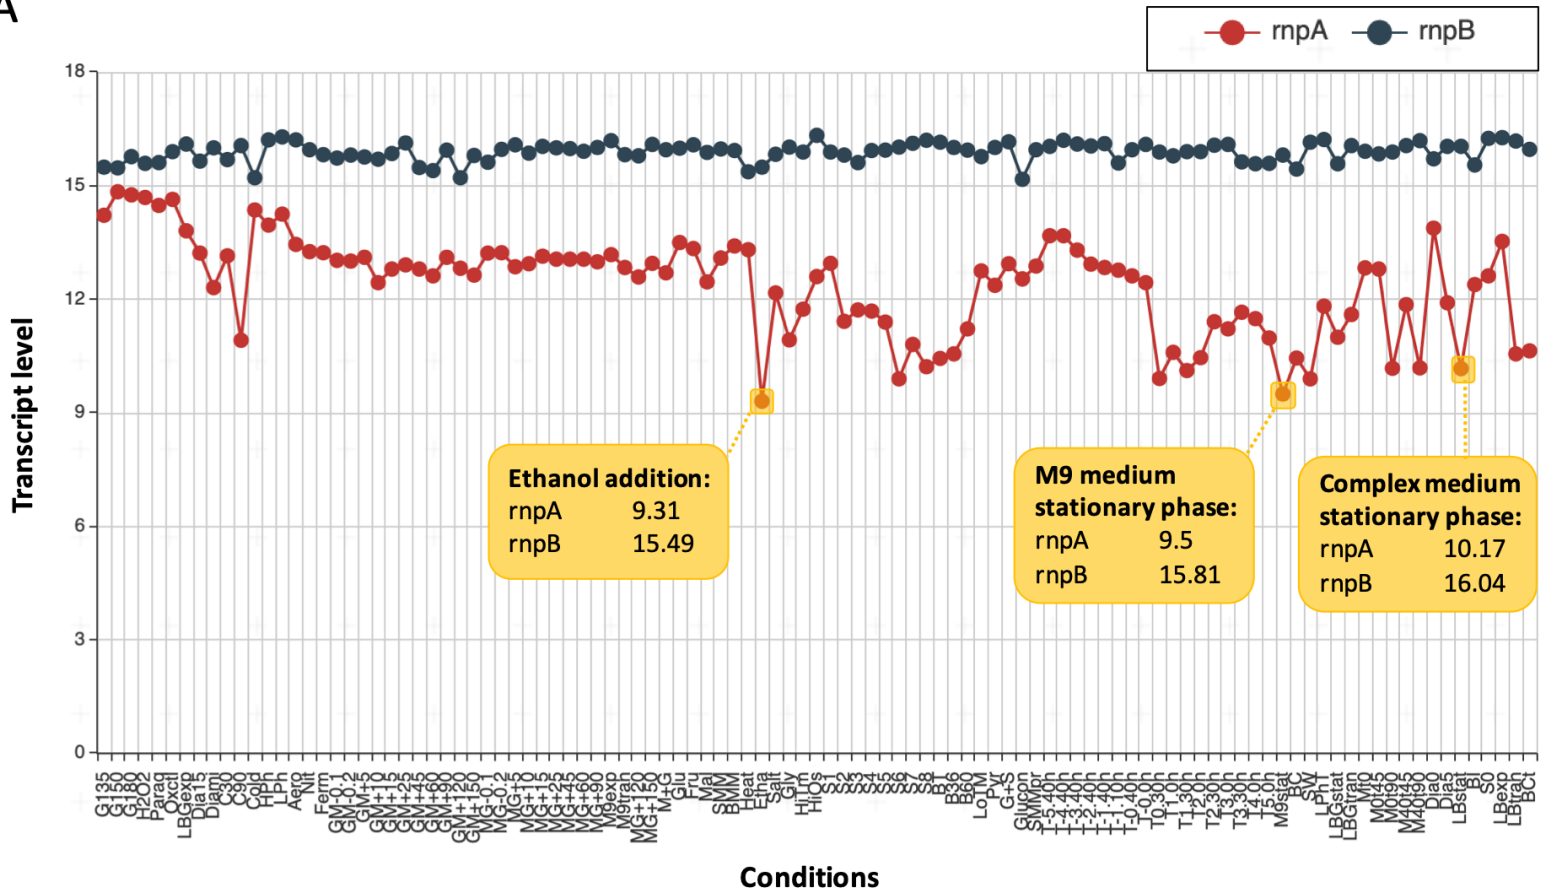

B

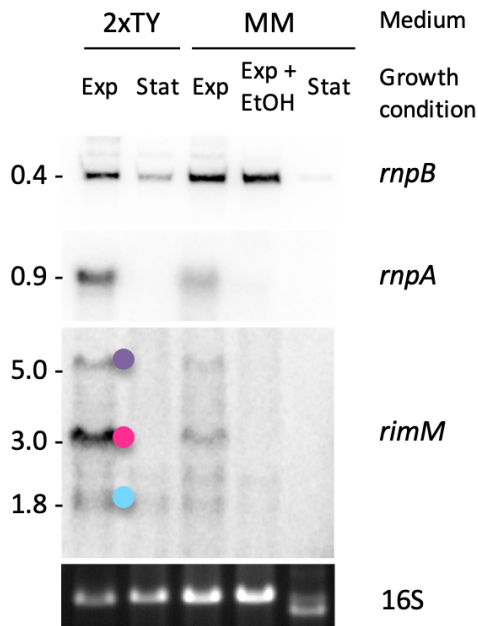

C

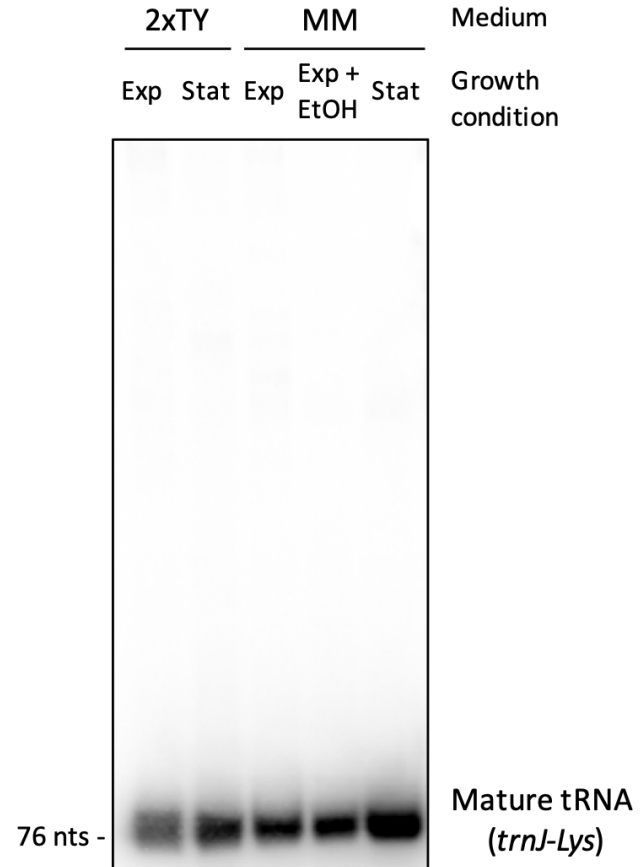

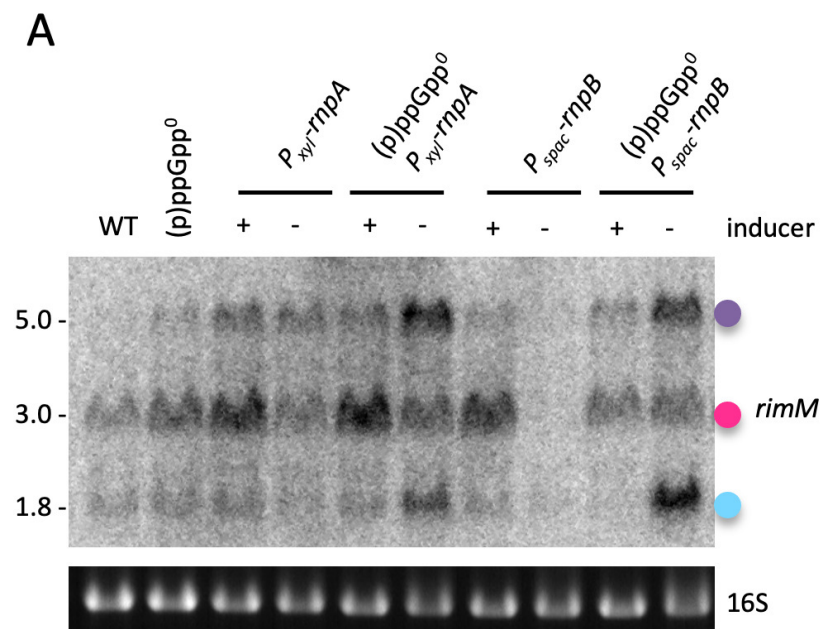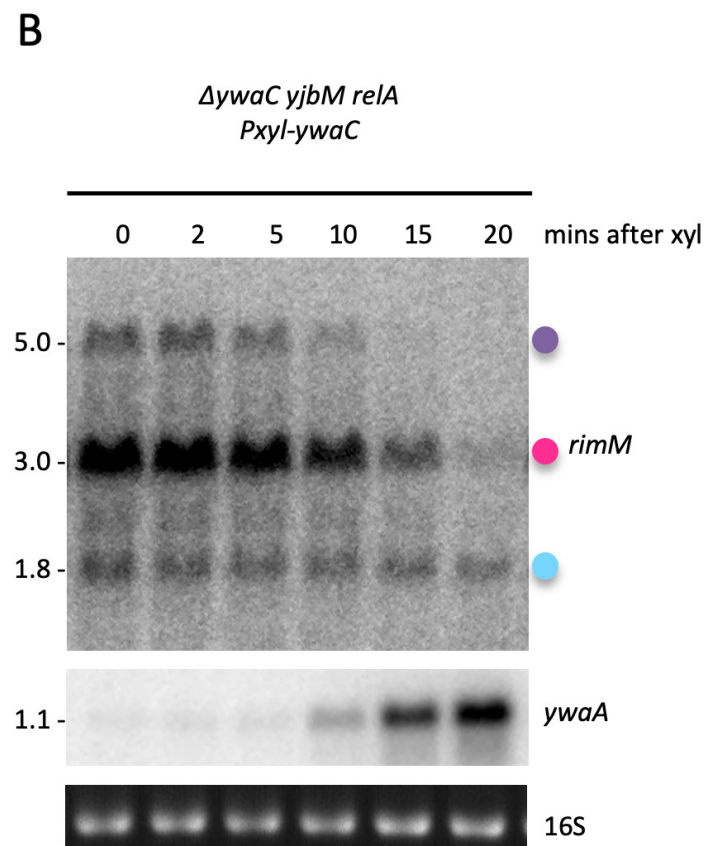

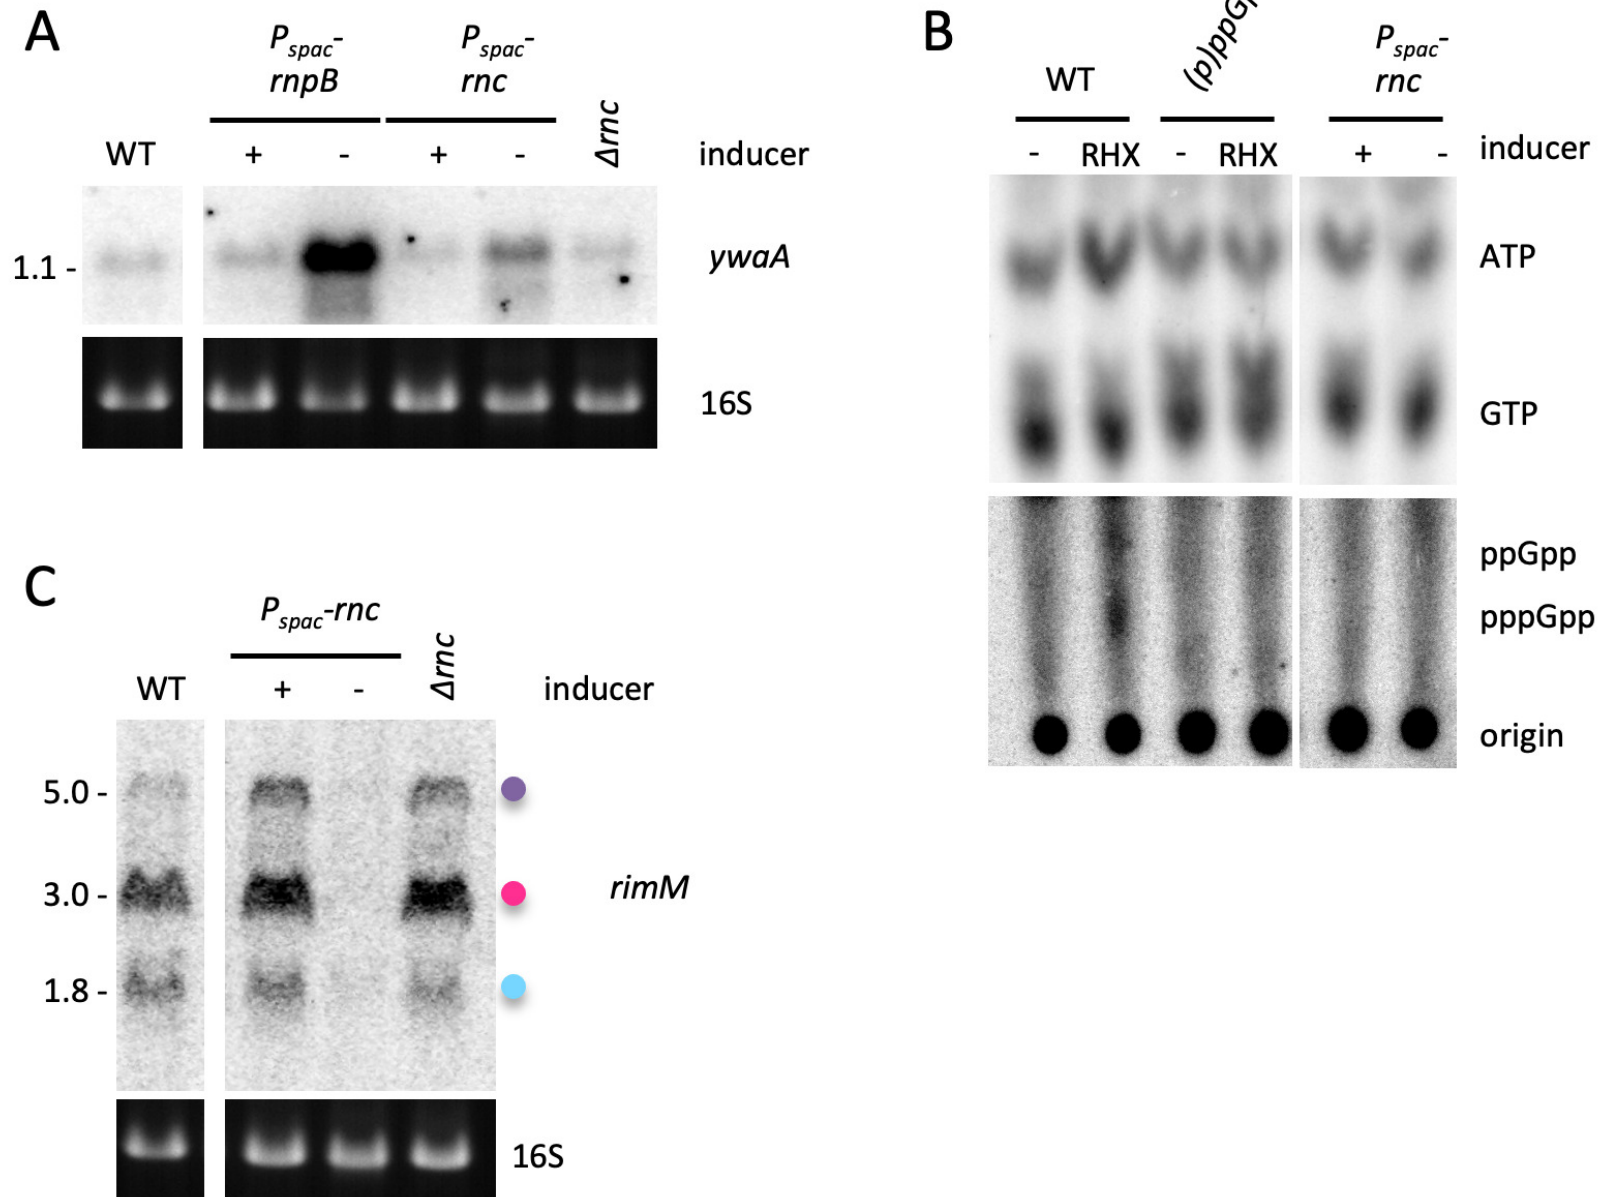

Source: https://www.biorxiv.org/content/biorxiv/early/2022/11/24/2022.11.23.517781.full.pdf
